# Supplementary material for: 2013 ACC/AHA Cholesterol Guideline Versus 2004 NCEP ATP III Guideline in the Prediction of Coronary Artery Calcification Progression in a Korean Population
Source: PubMed Central journal article supplement — J Am Heart Assoc. 2016 Aug 19;5(8):e003410. doi: 10.1161/JAHA.116.003410 (PMC5015275; doi:10.1161/jaha.116.003410), 2016-08-19
Supplement: JAH3-5-e003410-s001.pdf [file JAH3-5-e003410-s001.pdf]

## **SUPPLEMENTAL MATERIAL**

**TABLE S1.** Comparisons of the Odds Ratio of the 2 Statin Eligibility Guidelines for the Prediction of CAC Score Progression in Subjects with Baseline CAC score = 0

| Guidelines applied                    | C statistic      | OR (95% CI)      | P value | P value* |
|---------------------------------------|------------------|------------------|---------|----------|
| Statin eligible by ATP III guidelines | 0.55 (0.51–0.58) | 1.81 (1.11–2.97) | 0.018   | 0.0044   |
| Statin eligible by ACC/AHA guidelines | 0.62 (0.58–0.66) | 2.67 (1.76–4.05) | < 0.001 |          |

OR = odds ratio; CI = confidence interval; ATP III = Adult Treatment Panel III; ACC/AHA = American College of Cardiology/American Heart association; CAC = coronary artery calcification

\*P value between ATP III guidelines and ACC/AHA guidelines. P value is calculated by comparison of C statistic using the method of DeLong et al.

**TABLE S2.** Comparisons of the Odds Ratio of the 2 Statin Eligibility Guidelines for the Prediction of CAC Score Progression in Subjects with Baseline CAC score > 0

| Guidelines applied                    | C statistic      | OR (95% CI)      | P value | P value* |
|---------------------------------------|------------------|------------------|---------|----------|
| Statin eligible by ATP III guidelines | 0.55 (0.51–0.53) | 1.70 (1.12–2.43) | 0.012   | 0.7918   |
| Statin eligible by ACC/AHA guidelines | 0.56 (0.51–0.60) | 1.75 (1.17–2.61) | 0.006   |          |

OR = odds ratio; CI = confidence interval; ATP III = Adult Treatment Panel III; ACC/AHA = American College of Cardiology/American Heart association; CAC = coronary artery calcification

\*P value between ATP III guidelines and ACC/AHA guidelines. P value is calculated by comparison of C statistic using the method of DeLong et al.
